# Supplementary figures and images for: Nature-Inspired Ag/TiO₂ Nanoparticles: Fighting Drug Pollution and Infections Sustainably
Source: Research Square preprint supplement (doi:10.21203/rs.3.rs-7202802/v1), 2025-10-17

**GRAPHICAL ABSTRACT**


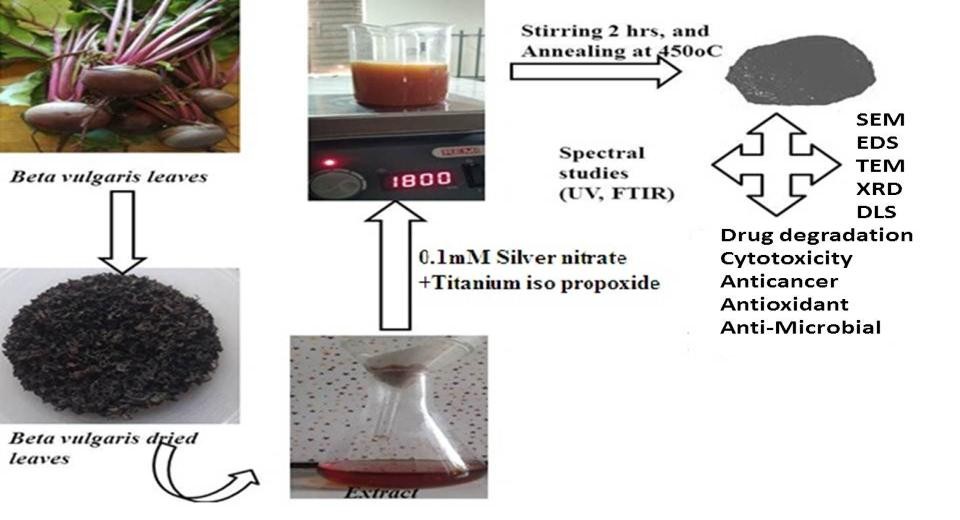

Supplement: Supplementary file 1 [file 90be10d91334a872324462f5.docx]
